# Supplementary material for: Speciation of gadolinium in gadolinium-based magnetic resonance imaging agents by high performance liquid chromatography inductively coupled plasma optical emission spectrometry
Source: Royal Society of Chemistry journal article supplement (doi:10.1039/b907044c), 2009-01-01
Supplement: b907044c.pdf [file b907044c.pdf]

**Speciation of gadolinium in gadolinium-based magnetic resonance  
imaging agents by high-performance liquid chromatography inductively  
coupled plasma optical emission spectrometry**

Chethaka L. Kahakachchi and Dennis A. Moore

*Supplementary material*

**Table S1.** Chromatographic parameters for Gd(III) complex analysis by HPLC-ICP-OES

| Column                                                 | Gd(III) complex        | $t_R^a$ | $k'^b$ | $N^c$ | Asymmetry <sup>d</sup> |
|--------------------------------------------------------|------------------------|---------|--------|-------|------------------------|
| XTerra <sup>TM</sup> RP-C18<br>(4.6 × 250 mm; 5 μm)    | Gd-DTPA-BMEA           | 7.8     | 2.12   | 319   | 1.00                   |
|                                                        | Gd-DTPA <sup>2-</sup>  | 3.1     | 0.24   | 389   | 1.62                   |
|                                                        | Gd-HP-DO3A             | 4.6     | 0.84   | 1352  | 1.26                   |
| Synergi <sup>TM</sup> RP-Hydro<br>(4.6 × 250 mm; 5 μm) | Gd-DTPA-BMA            | 7.8     | 2.12   | 1245  | 1.45                   |
|                                                        | Gd-DOTA <sup>1-</sup>  | 7.2     | 1.88   | 1255  | 1.00                   |
| BDS Hypersil <sup>TM</sup> C18<br>(4.6 × 50 mm; 3 μm)  | Gd-BOPTA <sup>2-</sup> | 5.5     | 5.88   | 1629  | 1.20                   |

<sup>a</sup> Retention time (minutes); <sup>b</sup> Capacity factor; <sup>c</sup> Theoretical plates; <sup>d</sup> Peak symmetry

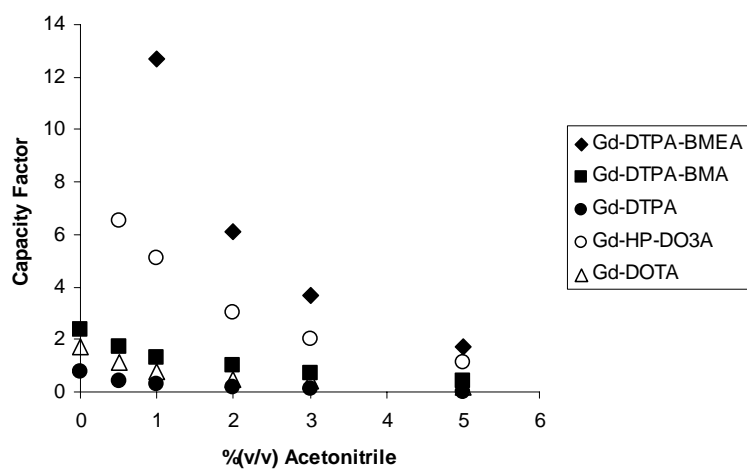

**Figure S1.** Effect of acetonitrile concentration in the mobile phase on the capacity factors of gadolinium(III) complexes. Mobile phase: 10 mM ammonium acetate at pH 7; stationary phase: Phenomenex Synergi<sup>TM</sup> 4  $\mu$ m RP-Hydro C18 (4.6 x 250 mm)

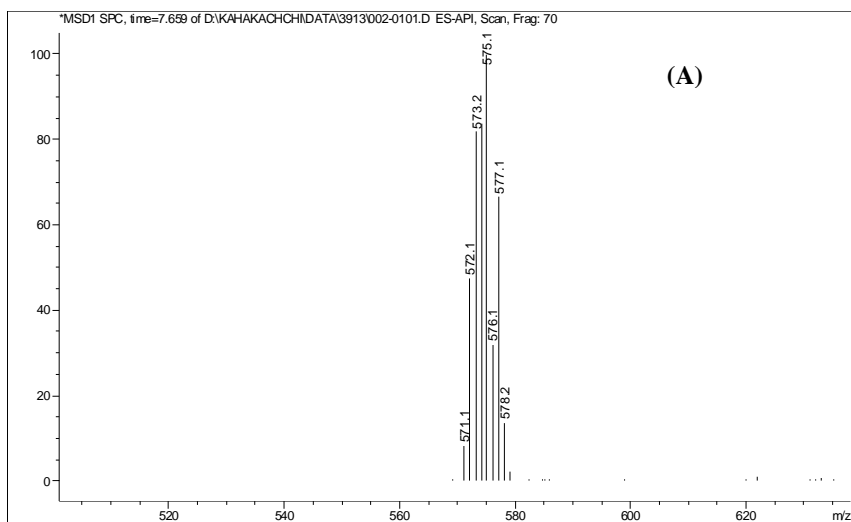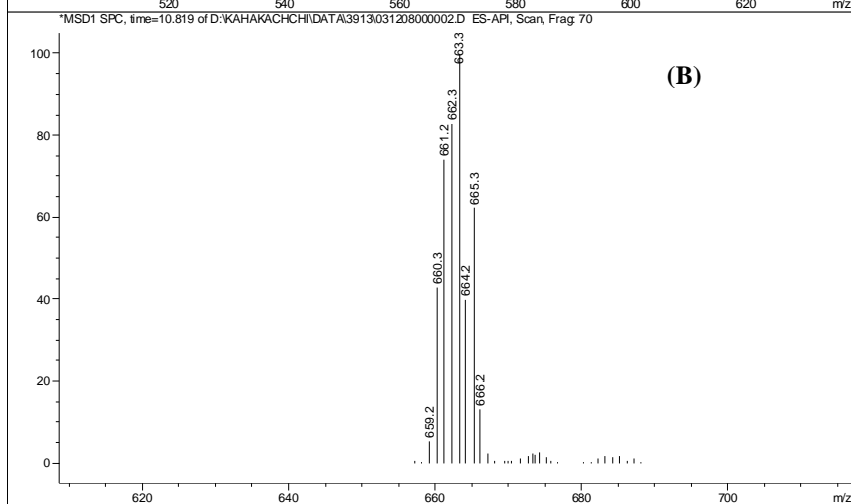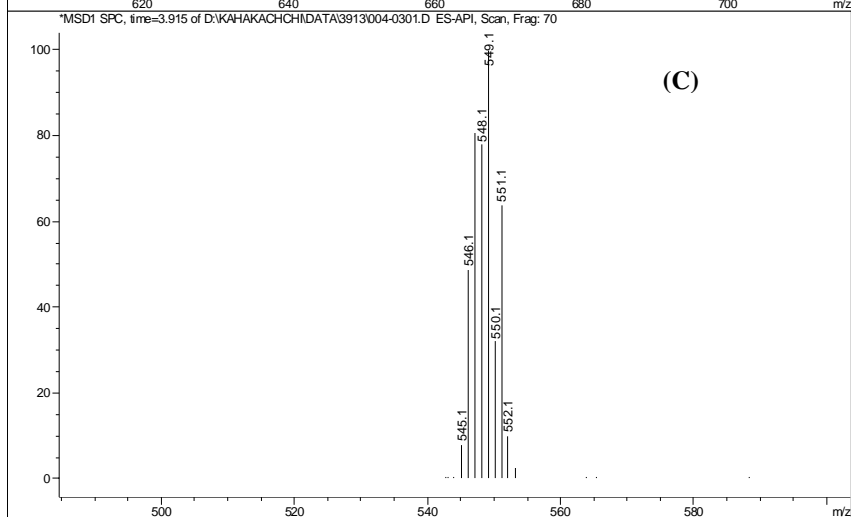

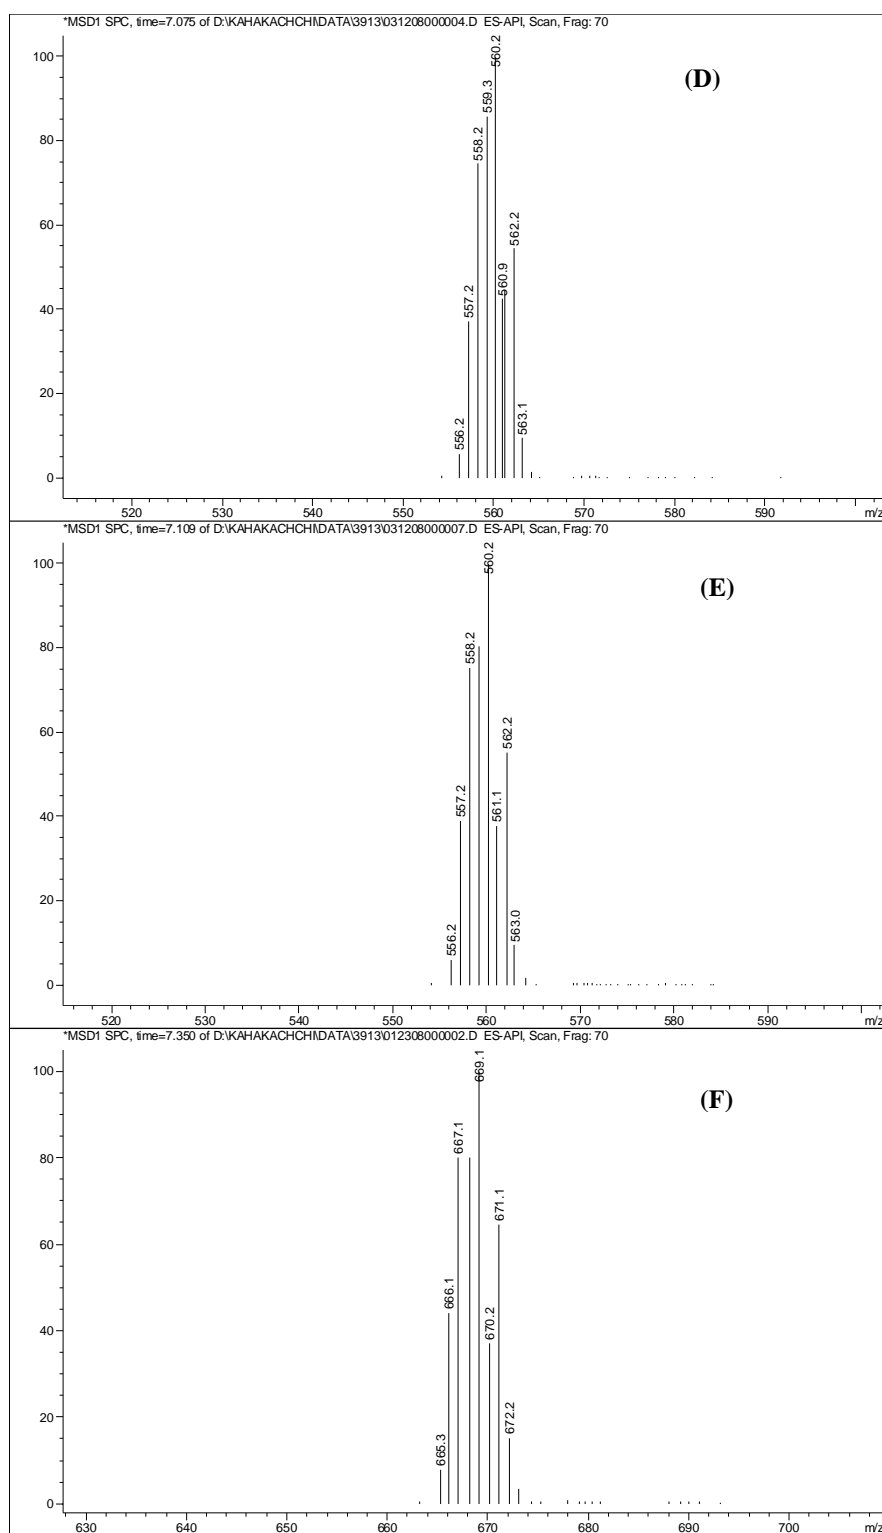

**Figure S2.** Electrospray ionization mass spectra: (A) Gd-DTPA-BMA; (B) Gd-DTPA-BMEA; (C) Gd-DTPA<sup>2-</sup>; (D) Gd-HP-DO3A; (E) Gd-DOTA<sup>1-</sup> and (F) Gd-BOPTA<sup>2-</sup>
